# Supplementary material for: Alkylresorcinols as New Modulators of the Metabolic Activity of the Gut Microbiota
Source: MDPI journal article supplement (doi:10.3390/ijms241814206), 2023-09-17
Supplement: s1 [file s1]

Supplementary Table S1. Primers used to amplify the V3-V4 region of bacterial 16S rRNA gene.

|                    |                                                              |
|--------------------|--------------------------------------------------------------|
| Forward<br>Primer: | <b>TCGTCGGCAGCGTCAGATGTGTATAAGAGACAGCCTACGGGAGGCAGCAG</b>    |
| Reverse<br>Primer: | <b>GTCTCGTGGGCTCGGAGATGTGTATAAGAGACAGGACTACAAGGATCTAATCC</b> |
